# Supplementary material
Source: MDPI journal article supplement (https://www.mdpi.com/2227-9717/10/12/2495)
Supplement: s1 [file s1]

**Table S1.** pH change during primary fermentation into Ale and Lager beers using *S. cerevisiae* 41CM, *S. cerevisiae* S-04 and *S. pastorianus* W-34/70 starters.

| Days | Ale                    |                        | Lager                  |                        |
|------|------------------------|------------------------|------------------------|------------------------|
|      | 41CM                   | S-04                   | 41CM                   | W-34/70                |
| 0    | 5.71±0.05 <sup>a</sup> | 5.69±0.05 <sup>a</sup> | 5.68±0.04 <sup>a</sup> | 5.69±0.02 <sup>a</sup> |
| 3    | 5.10±0.04 <sup>a</sup> | 5.08±0.06 <sup>a</sup> | 5.18±0.02 <sup>a</sup> | 5.20±0.02 <sup>a</sup> |
| 6    | 4.81±0.03 <sup>a</sup> | 4.88±0.05 <sup>a</sup> | 4.77±0.05 <sup>a</sup> | 4.80±0.03 <sup>a</sup> |
| 9    | 4.51±0.06 <sup>a</sup> | 4.52±0.02 <sup>a</sup> | 4.55±0.03 <sup>a</sup> | 4.57±0.03 <sup>a</sup> |
| 12   | 4.49±0.02 <sup>a</sup> | 4.48±0.03 <sup>a</sup> | 4.52±0.04 <sup>a</sup> | 4.51±0.06 <sup>a</sup> |
| 15   | 4.43±0.03 <sup>a</sup> | 4.43±0.02 <sup>a</sup> | 4.50±0.02 <sup>a</sup> | 4.48±0.04 <sup>a</sup> |

**Table S2.** Ethanol (% *v/v*) evolution during primary fermentation in Ale and Lager beers using *S. cerevisiae* 41CM, *S. cerevisiae* S-04 and *S. pastorianus* W-34/70 starters.

| Days | Ale                    |                        | Lager                  |                        |
|------|------------------------|------------------------|------------------------|------------------------|
|      | 41CM                   | S-04                   | 41CM                   | W-34/70                |
| 0    | 0.00±0.00 <sup>a</sup> | 0.00±0.00 <sup>a</sup> | 0.00±0.00 <sup>a</sup> | 0.00±0.00 <sup>a</sup> |
| 3    | 3.48±0.06 <sup>a</sup> | 3.59±0.07 <sup>a</sup> | 3.34±0.07 <sup>a</sup> | 3.18±0.05 <sup>a</sup> |
| 6    | 3.86±0.07 <sup>a</sup> | 3.90±0.05 <sup>a</sup> | 3.47±0.06 <sup>a</sup> | 3.33±0.03 <sup>b</sup> |
| 9    | 4.18±0.08 <sup>a</sup> | 4.43±0.08 <sup>b</sup> | 3.58±0.04 <sup>a</sup> | 3.89±0.07 <sup>b</sup> |
| 12   | 4.19±0.06 <sup>a</sup> | 4.46±0.03 <sup>b</sup> | 3.90±0.08 <sup>a</sup> | 4.38±0.05 <sup>b</sup> |
| 15   | 4.19±0.02 <sup>a</sup> | 4.46±0.04 <sup>b</sup> | 4.03±0.07 <sup>a</sup> | 4.49±0.06 <sup>b</sup> |

**Table S3.** Yeast viable cells count (log CFU/mL) during primary fermentation into Ale and Lager beers.

| Viable count<br>(log CFU/mL) | Fermenting time (days) |                        |                        |                        |                        |                        |
|------------------------------|------------------------|------------------------|------------------------|------------------------|------------------------|------------------------|
|                              | 0                      | 3                      | 6                      | 9                      | 12                     | 15                     |
| <b>41CM Ale</b>              | 6.47±0.01 <sup>d</sup> | 7.87±0.03 <sup>a</sup> | 7.83±0.02 <sup>a</sup> | 7.78±0.02 <sup>b</sup> | 7.67±0.01 <sup>c</sup> | 7.63±0.02 <sup>c</sup> |
| <b>S-04 Ale</b>              | 6.06±0.05 <sup>d</sup> | 7.14±0.03 <sup>c</sup> | 7.43±0.03 <sup>b</sup> | 7.81±0.01 <sup>a</sup> | 7.78±0.01 <sup>a</sup> | 7.75±0.04 <sup>a</sup> |
| <b>41CM Lager</b>            | 6.32±0.02 <sup>d</sup> | 7.69±0.01 <sup>a</sup> | 7.65±0.02 <sup>a</sup> | 7.09±0.04 <sup>b</sup> | 7.01±0.03 <sup>c</sup> | 7.05±0.03 <sup>c</sup> |
| <b>W-34/70 Lager</b>         | 6.24±0.03 <sup>d</sup> | 7.41±0.01 <sup>a</sup> | 7.17±0.03 <sup>b</sup> | 7.08±0.04 <sup>c</sup> | 7.06±0.02 <sup>c</sup> | 7.02±0.02 <sup>c</sup> |
